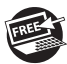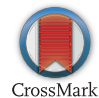

# Erratum

**Erratum. Predictive Low-Glucose Insulin Suspension Reduces Duration of Nocturnal Hypoglycemia in Children Without Increasing Ketosis. Diabetes Care 2015;38:1197–1204**

DOI: 10.2337/dc15-er09

In the print version of the article cited above, the clinical trial registry number should have been reported as NCT01823341, ClinicalTrials.gov, rather than NCT01591681. The online version reflects this change.

*Bruce A. Buckingham, Dan Raghinaru, Fraser Cameron, B. Wayne Bequette, H. Peter Chase, David M. Maahs, Robert Slover, R. Paul Wadwa, Darrell M. Wilson, Trang Ly, Tandy Aye, Irene Hramiak, Cheril Clarson, Robert Stein, Patricia H. Gallego, John Lum, Judy Sibayan, Craig Kollman, and Roy W. Beck, for the In Home Closed Loop Study Group*
